# Supplementary material
Source: PubMed Central journal article supplement (PMC3927690)
Supplement: 113.072132_ajcn072132SupplementaryData1.pdf [file 113.072132_ajcn072132SupplementaryData1.pdf]

**ONLINE SUPPLEMENTAL MATERIAL**

**Supplemental Table 1.** Food and beverage groups used in the Homescan and NHANES datasets.

| <b>FOOD CATEGORY</b>                                                        | <b>FOOD GROUP</b>                                                        |
|-----------------------------------------------------------------------------|--------------------------------------------------------------------------|
| <b>Carbonated sweetened and plain beverages</b>                             | Water/other drinks, unsweetened, carbonated/plain/flavored bottled water |
|                                                                             | Sugar sweetened beverages, sweetened, LCS <sup>1</sup>                   |
|                                                                             | Sugar sweetened beverages, sweetened, CS                                 |
| <b>Juice</b><br>[fruit juice and fruit drinks]                              | Sweetened, LCS                                                           |
|                                                                             | Sweetened, CS                                                            |
| <b>Milk and dairy drinks</b>                                                | Plain white milk & unsweetened dairy drinks                              |
|                                                                             | Sweetened, LCS                                                           |
|                                                                             | Sweetened, CS                                                            |
| <b>Coffee and Tea</b><br>[ready-to-drink, bags, grounds]                    | Unsweetened                                                              |
|                                                                             | Sweetened, LCS                                                           |
|                                                                             | Sweetened, CS                                                            |
| <b>Alcohol</b>                                                              | Wine, beer, alcoholic mixers                                             |
| <b>Dairy</b>                                                                | Yogurt and other dairy, plain/unsweetened                                |
|                                                                             | Yogurt and other dairy, sweetened LCS                                    |
|                                                                             | Yogurt and other dairy, sweetened CS                                     |
|                                                                             | Cheese, all types                                                        |
| <b>Fats, Sauces, Dressings</b>                                              | Cooking fats [oil, butter] and fat-based dressings                       |
|                                                                             | Nuts & nut spreads unsweetened                                           |
|                                                                             | Dressings/Sauces                                                         |
| <b>Protein Group</b>                                                        | Meat, fish, poultry [fresh/frozen/processed], eggs                       |
| <b>Vegetables</b>                                                           | All types [fresh/frozen/canned]                                          |
|                                                                             | Potatoes [including French fries] and starchy vegetables                 |
| <b>Fruits</b>                                                               | Plain [fresh/frozen/canned]                                              |
|                                                                             | Processed fruit, sweetened LCS                                           |
|                                                                             | Processed fruit, sweetened CS                                            |
| <b>Mixed, frozen, fast food meals</b><br>[ready-to-eat and prepared dishes] | Grain/meat based dishes, Mexican dishes, Soups                           |
|                                                                             | Sandwiches, Burgers, Pizza                                               |
| <b>Grains</b>                                                               | Plain pasta, rice, bread, unsweetened cereal                             |
|                                                                             | RTE cereals, sweetened LCS                                               |
|                                                                             | RTE cereals, sweetened CS                                                |
| <b>Discretionary</b>                                                        | Salty Snacks [chips, crackers, pretzels]                                 |
|                                                                             | Desserts and sweet snacks, LCS [cakes, cookies, pies, ice cream, candy]  |
|                                                                             | Desserts and sweet snacks, CS [cakes, cookies, pies, ice cream, candy]   |
|                                                                             | Sweeteners, LCS [sweetener packets, jams, jellies]                       |
|                                                                             | Sweeteners, CS [sugar, honey, jams, jellies]                             |
| <b>Other</b>                                                                | Other non-grouped food items [baby food, cooking supplies, etc]          |

<sup>1</sup> LCS low-calorie sweetener; CS caloric sweetener

**Supplemental Table 2.** Total daily household purchases of energy (kcal/day) and macronutrients (kcal/day, %) by beverage profile, HOMESCAN 2000-10<sup>1-2</sup>.

|                                              | ALL HOUSEHOLDS    |                    |               |                    |              |                    |                    |                    |
|----------------------------------------------|-------------------|--------------------|---------------|--------------------|--------------|--------------------|--------------------|--------------------|
|                                              | Non/low consumers |                    | LCS Beverages |                    | CS Beverages |                    | LCS & CS Beverages |                    |
|                                              | Mean              | ± SEM              | Mean          | ± SEM              | Mean         | ± SEM              | Mean               | ± SEM              |
| LCS- and CS-beverage purchases               |                   |                    |               |                    |              |                    |                    |                    |
| Total kcal/day                               | 56.3              | ± 0.4              | 52.9          | ± 0.7              | 191.0        | ± 0.6              | 138.6              | ± 0.5              |
| Total ml/day                                 | 257.1             | ± 1.4              | 577.3         | ± 1.9              | 548.9        | ± 1.7              | 692.0              | ± 1.5              |
| Total energy from purchases [kcal/day]       | 2824.3            | ± 4.3              | 3097.2        | ± 6.1              | 3391.6       | ± 5.3              | 3500.5             | ± 4.7              |
| Total energy excluding LCS/CS <sup>3</sup>   | 2764.7            | ± 4.2              | 3039.5        | ± 5.9              | 3208.3       | ± 5.1              | 3363.4             | ± 4.6              |
| Total energy from food                       | 2439.0            | ± 3.8              | 2706.1        | ± 5.4              | 2831.3       | ± 4.7              | 2987.9             | ± 4.1              |
| Total energy from beverages excluding LCS/CS | 325.8             | ± 0.8              | 332.3         | ± 1.2              | 377.8        | ± 1.1 <sup>4</sup> | 375.5              | ± 0.9 <sup>4</sup> |
| Total energy from beverages including LCS/CS | 384.3             | ± 1.0 <sup>4</sup> | 387.5         | ± 1.5 <sup>4</sup> | 564.9        | ± 1.2              | 513.0              | ± 1.1              |
| Macronutrients [kcal/day or %]               |                   |                    |               |                    |              |                    |                    |                    |
| Carbohydrates [kcal/day]                     | 1494.0            | ± 2.4              | 1613.6        | ± 3.4              | 1853.9       | ± 3.0              | 1873.9             | ± 2.6              |
| Sugar [kcal/day]                             | 736.2             | ± 1.4              | 771.6         | ± 2.0              | 989.4        | ± 1.7              | 954.3              | ± 1.5              |
| Total Fat [kcal/day]                         | 1008.1            | ± 1.7              | 1126.9        | ± 2.4              | 1185.2       | ± 2.1              | 1249.8             | ± 1.8              |
| Protein [kcal/day]                           | 294.7             | ± 0.6              | 331.1         | ± 1.0 <sup>4</sup> | 332.7        | ± 0.8 <sup>4</sup> | 359.2              | ± 0.7              |
| Saturated Fat [kcal/day]                     | 330.9             | ± 0.6              | 368.6         | ± 0.8              | 390.9        | ± 0.7              | 411.2              | ± 0.6              |
| Carbohydrates [%]                            | 52.7              | ± 0.0              | 51.8          | ± 0.0              | 54.6         | ± 0.0              | 53.5               | ± 0.0              |
| Sugar [%]                                    | 25.8              | ± 0.0              | 24.6          | ± 0.0              | 29.0         | ± 0.0              | 27.1               | ± 0.0              |
| Total Fat [%]                                | 35.5              | ± 0.0 <sup>4</sup> | 36.4          | ± 0.0              | 34.7         | ± 0.0              | 35.5               | ± 0.0 <sup>4</sup> |
| Protein [%]                                  | 10.9              | ± 0.0 <sup>4</sup> | 11.0          | ± 0.0 <sup>4</sup> | 9.9          | ± 0.0              | 10.3               | ± 0.0              |
| Saturated Fat [%]                            | 11.7              | ± 0.0 <sup>4</sup> | 11.9          | ± 0.0              | 11.4         | ± 0.0              | 11.7               | ± 0.0 <sup>4</sup> |
| SINGLE PERSON HOUSEHOLDS                     |                   |                    |               |                    |              |                    |                    |                    |
|                                              | Non/low consumers |                    | LCS Beverages |                    | CS Beverages |                    | LCS & CS Beverages |                    |
|                                              | Mean              | ± SEM              | Mean          | ± SEM              | Mean         | ± SEM              | Mean               | ± SEM              |
| LCS- and CS-beverage purchases               |                   |                    |               |                    |              |                    |                    |                    |
| Total kcal/day                               | 27.7              | ± 0.5              | 23.1          | ± 0.8              | 160.7        | ± 0.8              | 99.1               | ± 0.8              |
| Total ml/day                                 | 146.9             | ± 1.6              | 458.2         | ± 2.4              | 429.1        | ± 2.4              | 537.5              | ± 2.3              |
| Total energy from purchases [kcal/day]       | 1646.7            | ± 5.1              | 1818.4        | ± 7.4              | 1999.1       | ± 7.5              | 2087.7             | ± 7.1              |
| Total energy excluding LCS/CS <sup>3</sup>   | 1616.1            | ± 5.0              | 1790.4        | ± 7.2              | 1852.9       | ± 7.3              | 1991.6             | ± 7.0              |
| Total energy from food                       | 1419.2            | ± 4.6              | 1596.8        | ± 6.6              | 1629.7       | ± 6.7              | 1764.3             | ± 6.3              |
| Total energy from beverages excluding LCS/CS | 197.1             | ± 1.1              | 193.3         | ± 1.6              | 223.2        | ± 1.6 <sup>4</sup> | 226.9              | ± 1.5 <sup>4</sup> |
| Total energy from beverages including LCS/CS | 227.3             | ± 1.2              | 219.5         | ± 1.8              | 372.8        | ± 1.9              | 323.4              | ± 1.8              |
| Macronutrients [kcal/day or %]               |                   |                    |               |                    |              |                    |                    |                    |
| Carbohydrates [kcal/day]                     | 856.5             | ± 2.8              | 930.7         | ± 4.2              | 1096.5       | ± 4.2              | 1110.3             | ± 4.0              |
| Sugar [kcal/day]                             | 425.1             | ± 1.7              | 445.3         | ± 2.5              | 609.7        | ± 2.5              | 577.8              | ± 2.4              |
| Total Fat [kcal/day]                         | 589.8             | ± 2.0              | 668.5         | ± 3.0              | 690.0        | ± 3.0              | 744.1              | ± 2.8              |
| Protein [kcal/day]                           | 174.3             | ± 0.9              | 195.9         | ± 1.4 <sup>4</sup> | 196.0        | ± 1.4 <sup>4</sup> | 214.4              | ± 1.3              |
| Saturated Fat [kcal/day]                     | 194.8             | ± 0.7              | 220.5         | ± 1.0              | 229.6        | ± 1.0              | 246.2              | ± 1.0              |
| Carbohydrates [%]                            | 52.3              | ± 0.1              | 51.3          | ± 0.1              | 55.1         | ± 0.1              | 53.3               | ± 0.1              |
| Sugar [%]                                    | 25.8              | ± 0.1              | 24.5          | ± 0.1              | 30.2         | ± 0.1              | 27.5               | ± 0.1              |
| Total Fat [%]                                | 35.4              | ± 0.0 <sup>4</sup> | 36.5          | ± 0.1              | 33.9         | ± 0.1              | 35.2               | ± 0.1 <sup>4</sup> |
| Protein [%]                                  | 11.1              | ± 0.1 <sup>5</sup> | 11.0          | ± 0.2 <sup>5</sup> | 10.0         | ± 0.2 <sup>4</sup> | 10.4               | ± 0.1 <sup>4</sup> |
| Saturated Fat [%]                            | 11.7              | ± 0.0 <sup>4</sup> | 12.0          | ± 0.0              | 11.3         | ± 0.0              | 11.7               | ± 0.0 <sup>4</sup> |

**MULTI PERSON HOUSEHOLDS WITHOUT CHILDREN**

|                                              | <b>Non/low consumers</b>              |                    | <b>LCS Beverages</b> |                    | <b>CS Beverages</b> |                    | <b>LCS &amp; CS Beverages</b> |                    |
|----------------------------------------------|---------------------------------------|--------------------|----------------------|--------------------|---------------------|--------------------|-------------------------------|--------------------|
|                                              | Mean                                  | ± SEM              | Mean                 | ± SEM              | Mean                | ± SEM              | Mean                          | ± SEM              |
|                                              | <b>LCS- and CS-beverage purchases</b> |                    |                      |                    |                     |                    |                               |                    |
| Total kcal/day                               | 56.2                                  | ± 0.6              | 51.3                 | ± 0.9              | 190.8               | ± 0.8              | 134.4                         | ± 0.6              |
| Total ml/day                                 | 277.3                                 | ± 2.0              | 605.0                | ± 2.7              | 567.2               | ± 2.4              | 711.8                         | ± 2.1              |
| Total energy from purchases [kcal/day]       | 3003.2                                | ± 5.9              | 3232.0               | ± 7.8              | 3495.2              | ± 7.2              | 3576.8                        | ± 6.1              |
| Total energy excluding LCS/CS <sup>3</sup>   | 2942.8                                | ± 5.8              | 3174.8               | ± 7.6              | 3313.0              | ± 7.0              | 3443.7                        | ± 6.0              |
| Total energy from food                       | 2601.4                                | ± 5.3              | 2831.3               | ± 6.9              | 2931.8              | ± 6.4              | 3067.1                        | ± 5.4              |
| Total energy from beverages excluding LCS/CS | 341.7                                 | ± 1.2 <sup>4</sup> | 342.3                | ± 1.7 <sup>4</sup> | 382.5               | ± 1.5              | 376.6                         | ± 1.3              |
| Total energy from beverages including LCS/CS | 400.7                                 | ± 1.4 <sup>4</sup> | 396.5                | ± 1.9 <sup>4</sup> | 568.9               | ± 1.8              | 509.9                         | ± 1.5              |
| <b>Macronutrients [kcal/day or %]</b>        |                                       |                    |                      |                    |                     |                    |                               |                    |
| Carbohydrates [kcal/day]                     | 1557.1                                | ± 3.3              | 1651.3               | ± 4.3              | 1874.5              | ± 4.0 <sup>4</sup> | 1879.9                        | ± 3.4 <sup>4</sup> |
| Sugar [kcal/day]                             | 759.4                                 | ± 1.9              | 779.4                | ± 2.5              | 992.4               | ± 2.3              | 947.9                         | ± 2.0              |
| Total Fat [kcal/day]                         | 1091.1                                | ± 2.4              | 1195.7               | ± 3.2              | 1244.4              | ± 2.9              | 1299.9                        | ± 2.5              |
| Protein [kcal/day]                           | 314.1                                 | ± 0.9              | 347.4                | ± 1.4 <sup>4</sup> | 344.3               | ± 1.2 <sup>4</sup> | 370.1                         | ± 1.0              |
| Saturated Fat [kcal/day]                     | 354.6                                 | ± 0.8              | 387.4                | ± 1.1              | 407.4               | ± 1.0              | 424.2                         | ± 0.8              |
| Carbohydrates [%]                            | 51.9                                  | ± 0.0              | 51.0                 | ± 0.0              | 53.7                | ± 0.0              | 52.6                          | ± 0.0              |
| Sugar [%]                                    | 25.1                                  | ± 0.0              | 23.9                 | ± 0.0              | 28.2                | ± 0.0              | 26.3                          | ± 0.0              |
| Total Fat [%]                                | 36.1                                  | ± 0.0 <sup>4</sup> | 36.9                 | ± 0.0              | 35.3                | ± 0.0              | 36.0                          | ± 0.0 <sup>4</sup> |
| Protein [%]                                  | 10.8                                  | ± 0.0              | 11.0                 | ± 0.0              | 9.8                 | ± 0.0              | 10.3                          | ± 0.0              |
| Saturated Fat [%]                            | 11.7                                  | ± 0.0              | 11.9                 | ± 0.0              | 11.6                | ± 0.0              | 11.8                          | ± 0.0              |

**MULTI PERSON HOUSEHOLDS WITH CHILDREN**

|                                              | <b>Non/low consumers</b>              |                    | <b>LCS Beverages</b> |                    | <b>CS Beverages</b> |                    | <b>LCS &amp; CS Beverages</b> |                    |
|----------------------------------------------|---------------------------------------|--------------------|----------------------|--------------------|---------------------|--------------------|-------------------------------|--------------------|
|                                              | Mean                                  | ± SEM              | Mean                 | ± SEM              | Mean                | ± SEM              | Mean                          | ± SEM              |
|                                              | <b>LCS- and CS-beverage purchases</b> |                    |                      |                    |                     |                    |                               |                    |
| Total kcal/day                               | 79.5                                  | ± 1.1 <sup>4</sup> | 78.2                 | ± 2.1 <sup>4</sup> | 232.8               | ± 1.2              | 185.2                         | ± 1.0              |
| Total ml/day                                 | 309.4                                 | ± 3.1              | 657.3                | ± 5.7              | 640.8               | ± 3.3              | 802.2                         | ± 2.9              |
| Total energy from purchases [kcal/day]       | 3714.0                                | ± 10.5             | 4141.8               | ± 19.4             | 4485.1              | ± 11.1             | 4636.0                        | ± 9.7              |
| Total energy excluding LCS/CS <sup>3</sup>   | 3629.6                                | ± 10.2             | 4056.8               | ± 18.8             | 4258.2              | ± 10.7             | 4451.9                        | ± 9.4              |
| Total energy from food                       | 3192.0                                | ± 9.1              | 3598.5               | ± 16.9             | 3746.0              | ± 9.7              | 3939.6                        | ± 8.5              |
| Total energy from beverages excluding LCS/CS | 437.1                                 | ± 2.0              | 457.9                | ± 3.6              | 512.7               | ± 2.1 <sup>4</sup> | 512.9                         | ± 1.8 <sup>4</sup> |
| Total energy from beverages including LCS/CS | 520.6                                 | ± 2.4              | 541.1                | ± 4.4              | 741.3               | ± 2.5              | 697.1                         | ± 2.2              |
| <b>Macronutrients [kcal/day or %]</b>        |                                       |                    |                      |                    |                     |                    |                               |                    |
| Carbohydrates [kcal/day]                     | 2035.7                                | ± 6.0              | 2233.7               | ± 11.1             | 2510.2              | ± 6.3              | 2555.0                        | ± 5.5              |
| Sugar [kcal/day]                             | 1015.8                                | ± 3.5              | 1086.9               | ± 6.5              | 1336.3              | ± 3.7              | 1314.0                        | ± 3.2              |
| Total Fat [kcal/day]                         | 1289.5                                | ± 3.9              | 1463.4               | ± 7.3              | 1537.0              | ± 4.2              | 1614.8                        | ± 3.7              |
| Protein [kcal/day]                           | 390.1                                 | ± 1.3              | 443.3                | ± 2.6 <sup>4</sup> | 441.8               | ± 1.4 <sup>4</sup> | 471.8                         | ± 1.2              |
| Saturated Fat [kcal/day]                     | 427.7                                 | ± 1.4              | 483.7                | ± 2.5              | 511.0               | ± 1.4              | 536.2                         | ± 1.3              |
| Carbohydrates [%]                            | 54.8                                  | ± 0.0              | 53.8                 | ± 0.1              | 56.1                | ± 0.0              | 55.2                          | ± 0.0              |
| Sugar [%]                                    | 27.2                                  | ± 0.0              | 25.9                 | ± 0.1              | 29.8                | ± 0.0              | 28.3                          | ± 0.0              |
| Total Fat [%]                                | 34.6                                  | ± 0.0 <sup>4</sup> | 35.3                 | ± 0.1              | 34.1                | ± 0.0              | 34.7                          | ± 0.0 <sup>4</sup> |
| Protein [%]                                  | 11.0                                  | ± 0.0              | 11.3                 | ± 0.1              | 9.6                 | ± 0.0              | 10.1                          | ± 0.0              |
| Saturated Fat [%]                            | 11.5                                  | ± 0.0 <sup>4</sup> | 11.7                 | ± 0.0              | 11.3                | ± 0.0              | 11.5                          | ± 0.0 <sup>4</sup> |

<sup>1</sup> Mean ± SEM; LCS low-calorie sweetener; CS caloric sweetener

<sup>2</sup> Multivariable longitudinal random effects models, adjusted for year, race, income and household size

<sup>3</sup> Total energy excluding LCS/CS includes total energy from foods plus energy from all beverages excluding LCS/CS

<sup>4,5</sup> Estimates in the same row sharing a letter are not significantly different at the 5% level, Bonferroni adjusted Student's *t* test

**Supplemental Table 3.** Total daily intake of energy (kcal/day) and macronutrients (kcal/day, %) by beverage profile, NHANES 2003-2010<sup>1-2</sup>.

|                                              | ALL PARTICIPANTS >2 years old |                       |               |                       |              |                     |                    |                       |
|----------------------------------------------|-------------------------------|-----------------------|---------------|-----------------------|--------------|---------------------|--------------------|-----------------------|
|                                              | Non/low consumers             |                       | LCS Beverages |                       | CS Beverages |                     | LCS & CS Beverages |                       |
|                                              | Mean                          | ± SEM                 | Mean          | ± SEM                 | Mean         | ± SEM               | Mean               | ± SEM                 |
| LCS- and CS-beverage intake                  |                               |                       |               |                       |              |                     |                    |                       |
| Total kcal/day                               | 11.5                          | ± 0.6                 | 18.3          | ± 1.3                 | 248.0        | ± 4.4               | 175.6              | ± 6.2                 |
| Total ml/day                                 | 36.9                          | ± 2.0                 | 675.0         | ± 15.5 <sup>4</sup>   | 658.7        | ± 11.1 <sup>4</sup> | 880.4              | ± 24.4                |
| Total energy intake [kcal/day]               | 1901.4                        | ± 13.7 <sup>4</sup>   | 1944.1        | ± 16.9 <sup>4</sup>   | 2284.8       | ± 13.9 <sup>5</sup> | 2262.5             | ± 24.5 <sup>5</sup>   |
| Total energy excluding LCS/CS <sup>3</sup>   | 1889.9                        | ± 13.7 <sup>4</sup>   | 1925.8        | ± 16.8 <sup>4</sup>   | 2036.8       | ± 15.1 <sup>5</sup> | 2086.9             | ± 21.7 <sup>5</sup>   |
| Total energy from food                       | 1576.0                        | ± 11.7                | 1699.9        | ± 16.6                | 1761.2       | ± 12.5              | 1841.4             | ± 20.2                |
| Total energy from beverages excluding LCS/CS | 313.9                         | ± 3.9                 | 225.9         | ± 5.9 <sup>4</sup>    | 275.6        | ± 5.1               | 245.5              | ± 8.9 <sup>4</sup>    |
| Total energy from beverages including LCS/CS | 325.4                         | ± 4.0                 | 244.2         | ± 6.1                 | 523.7        | ± 5.8               | 421.1              | ± 12.1                |
| Macronutrients [kcal/day or %]               |                               |                       |               |                       |              |                     |                    |                       |
| Carbohydrates [kcal/day]                     | 936.9                         | ± 6.9                 | 884.1         | ± 10.9                | 1177.7       | ± 7.1               | 1102.8             | ± 12.2                |
| Sugar [kcal/day]                             | 416.3                         | ± 3.3                 | 338.1         | ± 6.4                 | 599.6        | ± 4.7               | 506.9              | ± 8.3                 |
| Total Fat [kcal/day]                         | 643.5                         | ± 5.9                 | 706.3         | ± 8.7                 | 754.6        | ± 6.0               | 792.7              | ± 11.1                |
| Protein [kcal/day]                           | 304.7                         | ± 2.2                 | 328.4         | ± 3.2 <sup>4</sup>    | 328.3        | ± 2.3 <sup>4</sup>  | 336.5              | ± 5.1 <sup>4</sup>    |
| Saturated Fat [kcal/day]                     | 216.0                         | ± 2.1                 | 233.1         | ± 3.0                 | 255.0        | ± 2.4 <sup>4</sup>  | 264.2              | ± 4.1 <sup>4</sup>    |
| Carbohydrates [%]                            | 50.0                          | ± 0.2 <sup>4</sup>    | 46.0          | ± 0.3                 | 52.1         | ± 0.2               | 49.4               | ± 0.3 <sup>4</sup>    |
| Sugar [%]                                    | 22.3                          | ± 0.1 <sup>4</sup>    | 17.6          | ± 0.2                 | 26.7         | ± 0.2               | 22.8               | ± 0.2 <sup>4</sup>    |
| Total Fat [%]                                | 33.3                          | ± 0.1                 | 35.9          | ± 0.3                 | 32.6         | ± 0.1               | 34.7               | ± 0.3                 |
| Protein [%]                                  | 16.2                          | ± 0.1                 | 17.2          | ± 0.1                 | 14.5         | ± 0.1               | 15.0               | ± 0.1                 |
| Saturated Fat [%]                            | 11.2                          | ± 0.1 <sup>4</sup>    | 11.9          | ± 0.1 <sup>5</sup>    | 11.0         | ± 0.1 <sup>4</sup>  | 11.5               | ± 0.1 <sup>5</sup>    |
| ADULTS >19 years old                         |                               |                       |               |                       |              |                     |                    |                       |
|                                              | Non/low consumers             |                       | LCS Beverages |                       | CS Beverages |                     | LCS & CS Beverages |                       |
|                                              | Mean                          | ± SEM                 | Mean          | ± SEM                 | Mean         | ± SEM               | Mean               | ± SEM                 |
| LCS- and CS-beverage intake                  |                               |                       |               |                       |              |                     |                    |                       |
| Total kcal/day                               | 15.8                          | ± 1.1                 | 20.5          | ± 1.5                 | 257.6        | ± 5.2               | 176.8              | ± 7.7                 |
| Total ml/day                                 | 50.8                          | ± 3.5                 | 697.7         | ± 15.3 <sup>4</sup>   | 677.5        | ± 12.9 <sup>4</sup> | 922.7              | ± 30.4                |
| Total energy intake [kcal/day]               | 2011.1                        | ± 15.7 <sup>4</sup>   | 1972.4        | ± 18.1 <sup>4</sup>   | 2278.9       | ± 17.9 <sup>5</sup> | 2257.4             | ± 32.4 <sup>5</sup>   |
| Total energy excluding LCS/CS <sup>3</sup>   | 1995.3                        | ± 15.9 <sup>4,5</sup> | 1951.8        | ± 17.9 <sup>5</sup>   | 2021.3       | ± 18.7 <sup>4</sup> | 2080.6             | ± 29.9 <sup>4</sup>   |
| Total energy from food                       | 1678.9                        | ± 12.9 <sup>4</sup>   | 1731.1        | ± 17.7 <sup>4,5</sup> | 1746.1       | ± 15.4 <sup>5</sup> | 1837.9             | ± 28.4                |
| Total energy from beverages excluding LCS/CS | 316.4                         | ± 5.4                 | 220.7         | ± 6.4 <sup>4</sup>    | 275.2        | ± 6.2 <sup>5</sup>  | 242.6              | ± 11.7 <sup>4,5</sup> |
| Total energy from beverages including LCS/CS | 332.2                         | ± 5.5                 | 241.3         | ± 6.8                 | 532.8        | ± 6.9               | 419.4              | ± 15.7                |
| Macronutrients [kcal/day or %]               |                               |                       |               |                       |              |                     |                    |                       |
| Carbohydrates [kcal/day]                     | 959.6                         | ± 7.9                 | 881.7         | ± 11.3                | 1166.9       | ± 8.9               | 1080.9             | ± 15.1                |
| Sugar [kcal/day]                             | 407.5                         | ± 4.3                 | 328.5         | ± 6.5                 | 599.2        | ± 5.9               | 493.2              | ± 9.9                 |
| Total Fat [kcal/day]                         | 684.9                         | ± 7.3                 | 718.1         | ± 9.2                 | 751.0        | ± 7.5 <sup>4</sup>  | 792.6              | ± 14.8 <sup>4</sup>   |
| Protein [kcal/day]                           | 331.1                         | ± 2.7 <sup>4</sup>    | 337.8         | ± 3.2 <sup>4</sup>    | 328.0        | ± 3.0 <sup>4</sup>  | 339.7              | ± 5.8 <sup>4</sup>    |
| Saturated Fat [kcal/day]                     | 224.8                         | ± 2.8 <sup>4</sup>    | 233.8         | ± 3.1 <sup>4</sup>    | 251.6        | ± 2.9 <sup>5</sup>  | 263.3              | ± 5.4 <sup>5</sup>    |
| Carbohydrates [%]                            | 48.3                          | ± 0.2 <sup>4</sup>    | 45.2          | ± 0.3                 | 51.8         | ± 0.2               | 48.6               | ± 0.3 <sup>4</sup>    |
| Sugar [%]                                    | 20.6                          | ± 0.2                 | 16.8          | ± 0.2                 | 26.7         | ± 0.2               | 22.3               | ± 0.3                 |
| Total Fat [%]                                | 33.5                          | ± 0.2                 | 35.9          | ± 0.2                 | 32.6         | ± 0.2               | 34.7               | ± 0.3                 |
| Protein [%]                                  | 16.7                          | ± 0.1                 | 17.5          | ± 0.1                 | 14.5         | ± 0.1               | 15.2               | ± 0.2                 |
| Saturated Fat [%]                            | 10.9                          | ± 0.1 <sup>4</sup>    | 11.7          | ± 0.1 <sup>5</sup>    | 10.9         | ± 0.1 <sup>4</sup>  | 11.5               | ± 0.1 <sup>5</sup>    |

|                                              | CHILDREN 2-18 years old |                     |               |                       |              |                       |                    |                     |
|----------------------------------------------|-------------------------|---------------------|---------------|-----------------------|--------------|-----------------------|--------------------|---------------------|
|                                              | Non/low consumers       |                     | LCS Beverages |                       | CS Beverages |                       | LCS & CS Beverages |                     |
|                                              | Mean                    | ± SEM               | Mean          | ± SEM                 | Mean         | ± SEM                 | Mean               | ± SEM               |
| LCS- and CS-beverage intake                  |                         |                     |               |                       |              |                       |                    |                     |
| Total kcal/day                               | 27.8                    | ± 1.9               | 0.5           | ± 2.3                 | 195.5        | ± 4.5                 | 151.7              | ± 6.0               |
| Total ml/day                                 | 81.4                    | ± 5.2               | 394.8         | ± 26.9                | 527.1        | ± 11.9                | 697.4              | ± 19.4              |
| Total energy intake [kcal/day]               | 1819.6                  | ± 15.4 <sup>4</sup> | 1774.5        | ± 47.4 <sup>4</sup>   | 2089.2       | ± 17.3 <sup>5</sup>   | 2118.1             | ± 40.4 <sup>5</sup> |
| Total energy excluding LCS/CS <sup>3</sup>   | 1791.8                  | ± 16.0 <sup>4</sup> | 1775.0        | ± 46.6 <sup>4</sup>   | 1893.7       | ± 16.3 <sup>4,5</sup> | 1966.4             | ± 39.3 <sup>5</sup> |
| Total energy from food                       | 1469.2                  | ± 14.6 <sup>4</sup> | 1529.5        | ± 36.7 <sup>4,5</sup> | 1627.1       | ± 15.5 <sup>5,6</sup> | 1720.1             | ± 35.9 <sup>6</sup> |
| Total energy from beverages excluding LCS/CS | 322.6                   | ± 6.2               | 245.5         | ± 17.2 <sup>4</sup>   | 266.6        | ± 5.0 <sup>4</sup>    | 246.4              | ± 11.9 <sup>4</sup> |
| Total energy from beverages including LCS/CS | 350.4                   | ± 6.4               | 245.1         | ± 17.6                | 462.1        | ± 5.7                 | 398.1              | ± 13.2              |
| Macronutrients [kcal/day or %]               |                         |                     |               |                       |              |                       |                    |                     |
| Carbohydrates [kcal/day]                     | 958.8                   | ± 9.1 <sup>4</sup>  | 876.5         | ± 35.7 <sup>4</sup>   | 1133.3       | ± 9.4 <sup>5</sup>    | 1108.8             | ± 20.8 <sup>5</sup> |
| Sugar [kcal/day]                             | 461.0                   | ± 5.4               | 380.4         | ± 23.8                | 587.5        | ± 5.3                 | 536.3              | ± 11.3              |
| Total Fat [kcal/day]                         | 603.9                   | ± 6.3 <sup>4</sup>  | 633.7         | ± 20.0 <sup>4</sup>   | 691.7        | ± 7.4 <sup>5</sup>    | 739.6              | ± 18.5 <sup>5</sup> |
| Protein [kcal/day]                           | 274.4                   | ± 2.8 <sup>4</sup>  | 280.5         | ± 7.5 <sup>4</sup>    | 285.8        | ± 2.5 <sup>4</sup>    | 294.3              | ± 7.7 <sup>4</sup>  |
| Saturated Fat [kcal/day]                     | 213.7                   | ± 2.1 <sup>5</sup>  | 223.2         | ± 9.0 <sup>4,5</sup>  | 244.6        | ± 2.8 <sup>4</sup>    | 252.2              | ± 6.4 <sup>4</sup>  |
| Carbohydrates [%]                            | 53.0                    | ± 0.2 <sup>4</sup>  | 49.2          | ± 1.1                 | 54.7         | ± 0.2                 | 52.9               | ± 0.5 <sup>4</sup>  |
| Sugar [%]                                    | 25.5                    | ± 0.2 <sup>4</sup>  | 21.4          | ± 1.0                 | 28.6         | ± 0.2                 | 25.8               | ± 0.4 <sup>4</sup>  |
| Total Fat [%]                                | 32.8                    | ± 0.2 <sup>4</sup>  | 35.7          | ± 0.8 <sup>5</sup>    | 32.7         | ± 0.2 <sup>4</sup>    | 34.4               | ± 0.4 <sup>5</sup>  |
| Protein [%]                                  | 15.2                    | ± 0.1 <sup>5</sup>  | 16.0          | ± 0.4 <sup>5</sup>    | 13.7         | ± 0.1 <sup>4</sup>    | 13.9               | ± 0.1 <sup>4</sup>  |
| Saturated Fat [%]                            | 11.6                    | ± 0.1 <sup>4</sup>  | 12.6          | ± 0.4 <sup>4</sup>    | 11.6         | ± 0.1 <sup>4</sup>    | 11.8               | ± 0.2 <sup>4</sup>  |

<sup>1</sup> Mean ± SEM; LCS low-calorie sweetener; CS caloric sweetener

<sup>2</sup> Multivariable linear regressions, adjusting for year, age, gender, race and income

<sup>3</sup> Total energy excluding LCS/CS includes total energy from foods plus energy from all beverages excluding LCS/CS

<sup>4,5,6</sup> Estimates in the same row sharing a letter are not significantly different at the 5% level, Bonferroni adjusted Student's *t* test
